# Supplementary material for: Mortality Prediction of Patients with Subarachnoid Hemorrhage Using a Deep Learning Model Based on an Initial Brain CT Scan
Source: MDPI journal article supplement (doi:10.3390/brainsci14010010), 2023-12-22
Supplement: s1 [file s1]

SUPPLEMENTARY MATERIALS

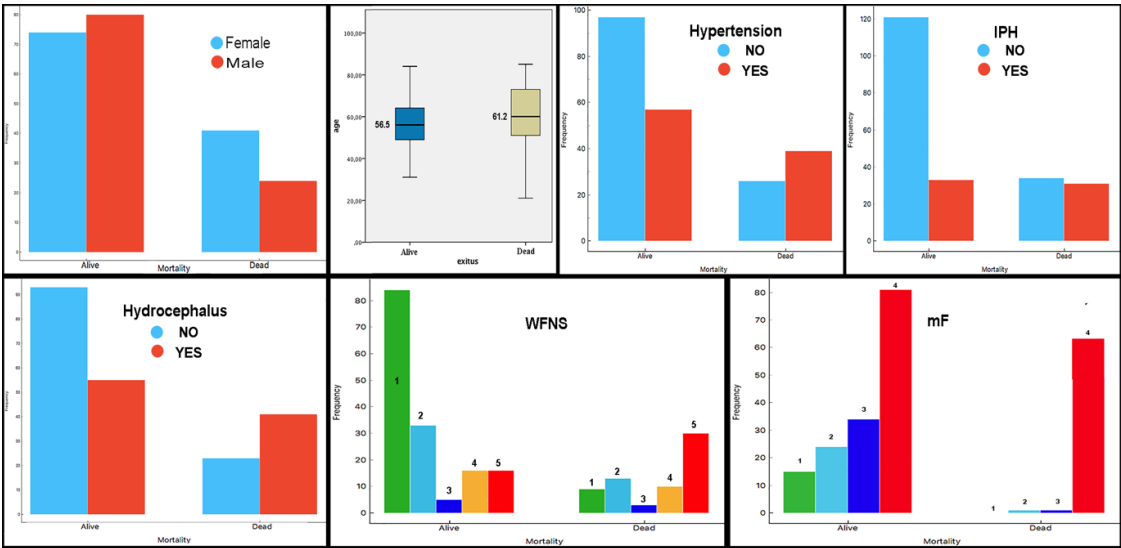

**Supplementary Figure S1.** Distribution of mortality according to Risk factors: **A:** Sex; **B:** Age; **C:** Hypertension (HT); **D:** Intraparenchymal hematoma (IPH); **E:** Acute Hydrocephalus; **F:** WFNS and **G:** Modified Fisher (mF).

**Supplementary Table S1.** CT scan protocol parameters. *CTDIvol*: Computed Tomography Dose Index volume.

|                       |              |          |
|-----------------------|--------------|----------|
| Manufacturer          | PHILIPS      | SIEMENS  |
| Model                 | Ingenuity CT | Somatom  |
| Scan Mode             | Spiral       | Spiral   |
| Tube Voltage (kV)     | 120          | 120      |
| Exposure(mAs)         | 189-221      | 199-262  |
| Average CTDIvol (mGy) | 48           | 57       |
| Rotation Time (s)     | 0.4          | 1        |
| Collimation           | 64x 0.625    | 64x0.625 |
| Pitch factor          | 0.3          | 0.5      |
| Slice Thickness(mm)   | 3-4          | 2-4      |
| Number of slices      | 64-99        | 66-150   |
| Field of view (mm)    | 250          | 250      |
| Samples per pixel     | 1            | 1        |
| CT detector array     | 512x512      | 512x512  |

**Supplementary Table S2.** Performance of Neural Networks Algorithms. Results for classes.  
FDR: False Discovery Rate; FN: False Negative; FP: False Positive; R: Rate; TN: True Negative;  
TP: True Positive.

|       |             | Image-based Neural Network performance |         |           |      | Image and Metadata based Neural Network performance |         |           |      |
|-------|-------------|----------------------------------------|---------|-----------|------|-----------------------------------------------------|---------|-----------|------|
| Class | Metric      | Best AUC                               | Best F1 | Best Loss | Last | Best AUC                                            | Best F1 | Best Loss | Last |
| ALIVE | TP          | 27                                     | 25      | 19        | 22   | 29                                                  | 24      | 23        | 30   |
|       | TN          | 2                                      | 5       | 11        | 10   | 3                                                   | 9       | 8         | 0    |
|       | FP          | 11                                     | 8       | 2         | 3    | 10                                                  | 4       | 5         | 13   |
|       | FN          | 3                                      | 5       | 11        | 8    | 1                                                   | 6       | 7         | 0    |
|       | Sensitivity | 0.90                                   | 0.83    | 0.63      | 0.73 | 0.97                                                | 0.80    | 0.77      | 1    |
|       | Specificity | 0.15                                   | 0.38    | 0.85      | 0.77 | 0.23                                                | 0.69    | 0.62      | 0    |
|       | Precision   | 0.71                                   | 0.76    | 0.90      | 0.88 | 0.74                                                | 0.86    | 0.82      | 0.70 |
|       | FPR         | 0.85                                   | 0.62    | 0.15      | 0.23 | 0.77                                                | 0.31    | 0.38      | 1    |
|       | FNR         | 0.10                                   | 0.17    | 0.37      | 0.27 | 0.03                                                | 0.20    | 0.23      | 0.00 |
|       | FDR         | 0.29                                   | 0.24    | 0.10      | 0.12 | 0.26                                                | 0.14    | 0.18      | 0.30 |
|       | Accuracy    | 0.67                                   | 0.70    | 0.70      | 0.74 | 0.74                                                | 0.77    | 0.72      | 0.70 |
|       | F1          | 0.79                                   | 0.79    | 0.75      | 0.80 | 0.84                                                | 0.83    | 0.79      | 0.82 |
|       | AUC         | 0.72                                   | 0.74    | 0.73      | 0.82 | 0.78                                                | 0.80    | 0.78      | 0.35 |
| DEAD  | TP          | 2                                      | 5       | 11        | 10   | 3                                                   | 9       | 8         | 0    |
|       | TN          | 27                                     | 25      | 19        | 22   | 29                                                  | 24      | 23        | 30   |
|       | FP          | 3                                      | 5       | 11        | 8    | 1                                                   | 6       | 7         | 0    |
|       | FN          | 11                                     | 8       | 2         | 3    | 10                                                  | 4       | 5         | 13   |
|       | Sensitivity | 0.15                                   | 0.38    | 0.85      | 0.77 | 0.23                                                | 0.69    | 0.62      | 0    |
|       | Specificity | 0.90                                   | 0.83    | 0.63      | 0.73 | 0.97                                                | 0.80    | 0.77      | 1.00 |
|       | Precision   | 0.40                                   | 0.50    | 0.50      | 0.56 | 0.75                                                | 0.60    | 0.53      | -    |
|       | FPR         | 0.10                                   | 0.17    | 0.37      | 0.27 | 0.03                                                | 0.20    | 0.23      | 0    |
|       | FNR         | 0.85                                   | 0.62    | 0.15      | 0.23 | 0.77                                                | 0.31    | 0.38      | 1    |
|       | FDR         | 0.60                                   | 0.50    | 0.50      | 0.44 | 0.25                                                | 0.40    | 0.47      | -    |
|       | Accuracy    | 0.67                                   | 0.70    | 0.70      | 0.74 | 0.74                                                | 0.77    | 0.72      | 0.70 |
|       | F1          | 0.22                                   | 0.43    | 0.63      | 0.65 | 0.35                                                | 0.64    | 0.57      | 0    |
|       | AUC         | 0.72                                   | 0.74    | 0.73      | 0.82 | 0.78                                                | 0.80    | 0.78      | 0.35 |
